# Supplementary material for: Modulating luminescence properties of CsMnBr3-based lead-free single crystals by pseudohalide doping
Source: Royal Society of Chemistry journal article supplement (doi:10.1039/d3tc04431a), 2024-01-01
Supplement: d3tc04431a1.pdf [file d3tc04431a1.pdf]

## Supplement information

# Modulating luminescence properties of CsMnBr<sub>3</sub> based lead-free single crystals by Pseudohalide doping

*Yang Yang<sup>1#</sup>, Zisheng Wang<sup>1#</sup>, Jiahao Jie<sup>3</sup>, Chunqing Hou<sup>1</sup>, Yilong Song<sup>1</sup>, Yuhao Fu<sup>2\*</sup>,  
Lijun Zhang<sup>3</sup>, Qingfeng Dong<sup>1\*</sup>*

<sup>1</sup>State Key Laboratory of Supramolecular Structure and Materials, College of Chemistry, Jilin University, Changchun 130012, China

<sup>2</sup>State Key Laboratory of Superhard Materials, Key Laboratory of Material Simulation Methods & Software of Ministry of Education, College of Physics, Jilin University, Changchun 130012, China

<sup>3</sup>State Key Laboratory of Integrated Optoelectronics, Key Laboratory of Automobile Materials of MOE, International Center of Computational Method and Software and College of Materials Science and Engineering, Jilin University, Changchun 130012, China

\*E-mail: [qfdong@jlu.edu.cn](mailto:qfdong@jlu.edu.cn); [fuyuhaoy@gmail.com](mailto:fuyuhaoy@gmail.com)

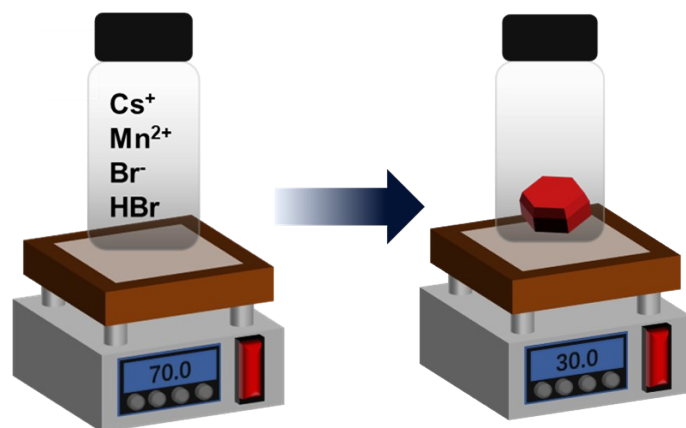

**Fig. S1.** Schematic diagram of single crystal growth via solution temperature-lowering method.

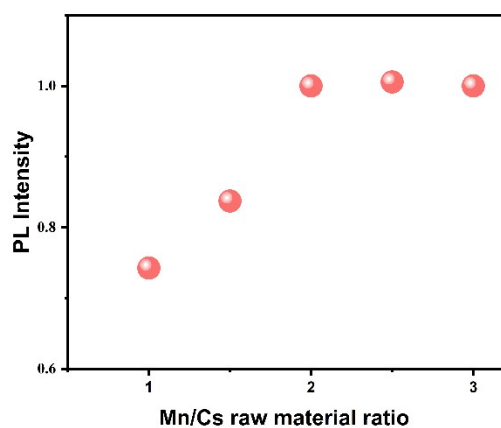

**Fig. S2.** Emission intensity/Highest emission intensity spectra of  $\text{CsMnBr}_3 \cdot 2\text{H}_2\text{O} : \text{Ac}^-$  grown at different Mn: Cs ratios.

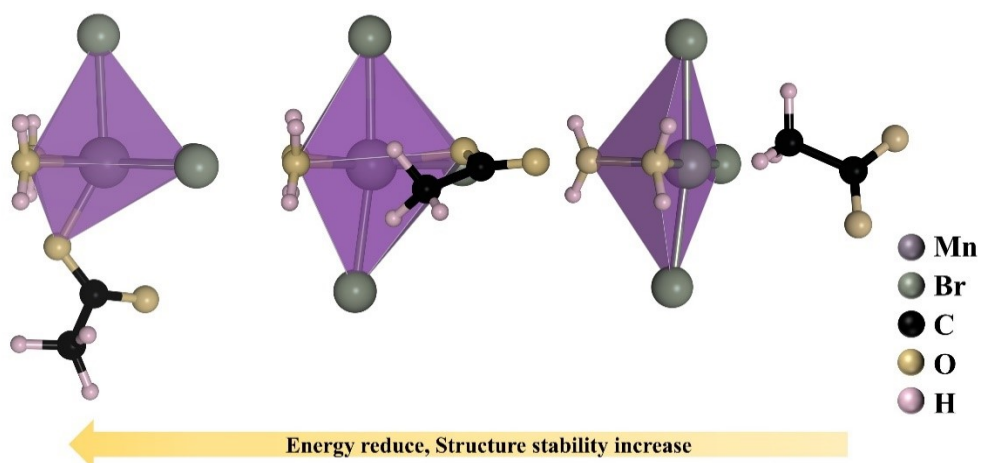

**Fig. S3.** Possible structure of  $\text{Ac}^-$  doped position.

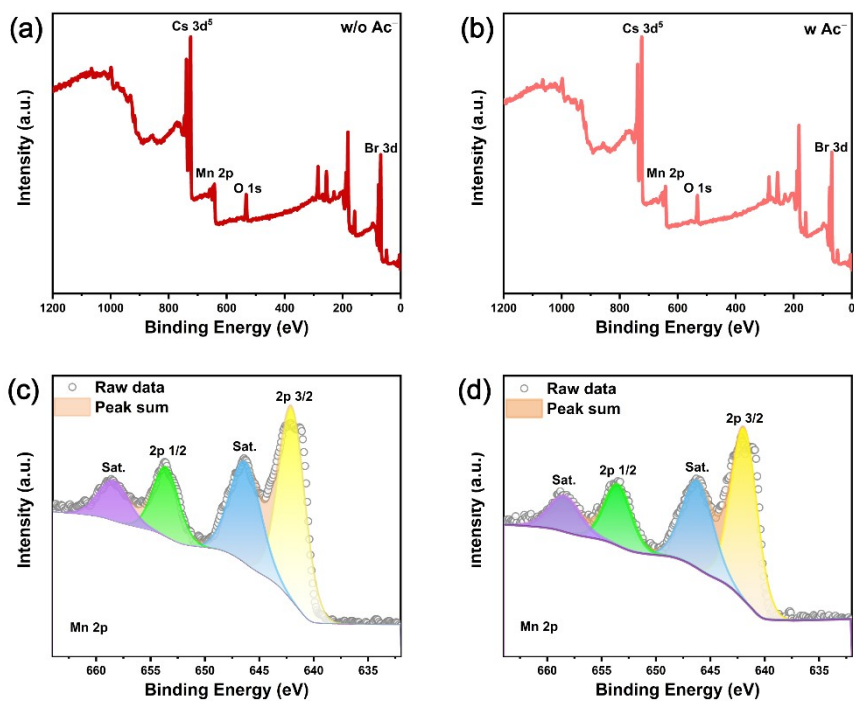

**Fig. S4.** (a)(b) Full range XPS survey spectrum of CsMnBr<sub>3</sub>·2H<sub>2</sub>O and CsMnBr<sub>3</sub>·2H<sub>2</sub>O:Ac<sup>-</sup>; (c)(d) high-resolution Mn 2p XPS spectra.

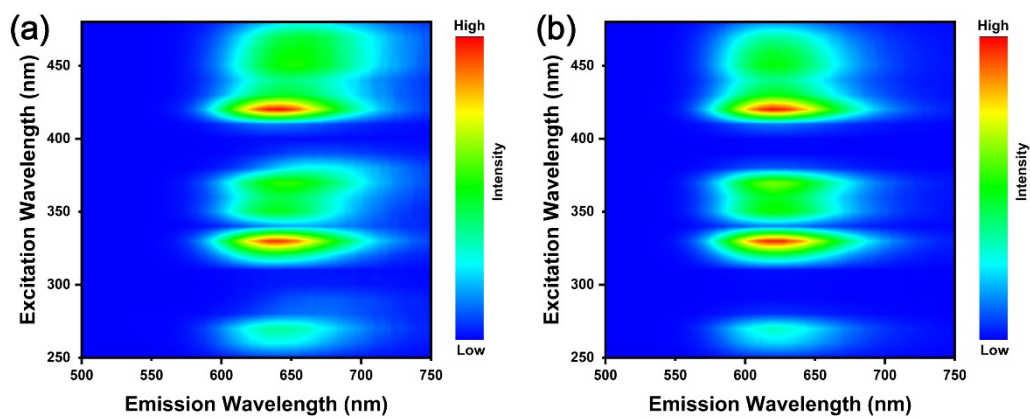

**Fig. S5.** (a)(b) Emission-excitation color maps of CsMnBr<sub>3</sub>·2H<sub>2</sub>O and CsMnBr<sub>3</sub>·2H<sub>2</sub>O:Ac<sup>-</sup>.

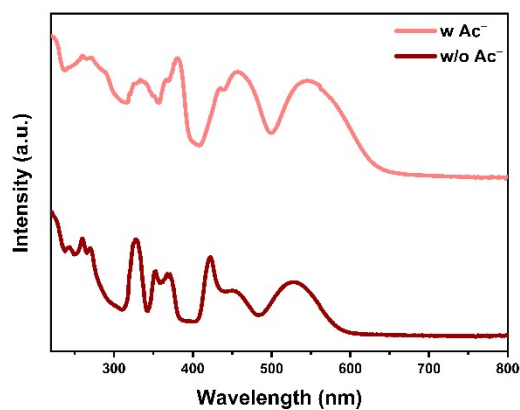

**Fig. S6.** UV-vis absorption spectra of  $\text{CsMnBr}_3 \cdot 2\text{H}_2\text{O}$  single crystal and  $\text{CsMnBr}_3 \cdot 2\text{H}_2\text{O} : \text{Ac}^-$  single crystal.

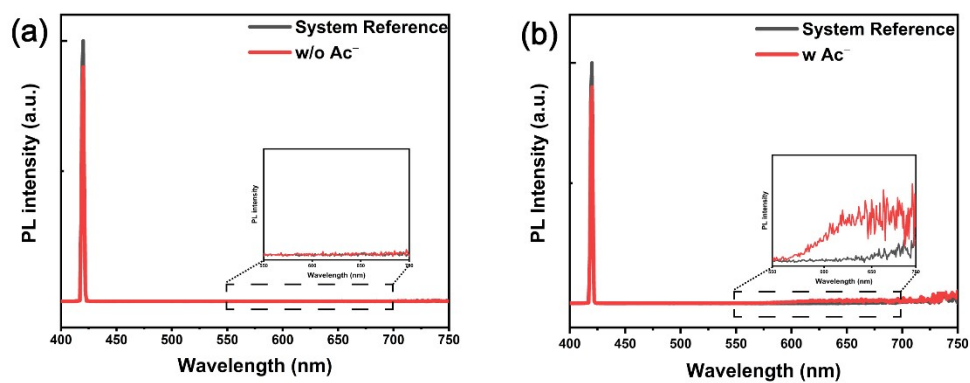

**Fig. S7.** (a)(b) PLQY measurements of  $\text{CsMnBr}_3 \cdot 2\text{H}_2\text{O}$  and  $\text{CsMnBr}_3 \cdot 2\text{H}_2\text{O} : \text{Ac}^-$  single crystal at room temperature.

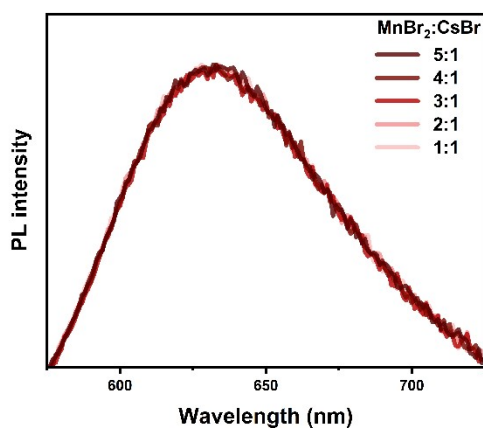

**Fig. S8.** PL emission spectra of  $\text{CsMnBr}_3 \cdot 2\text{H}_2\text{O}$  grown at different  $\text{MnBr}_2 : \text{CsBr}$  ratios.

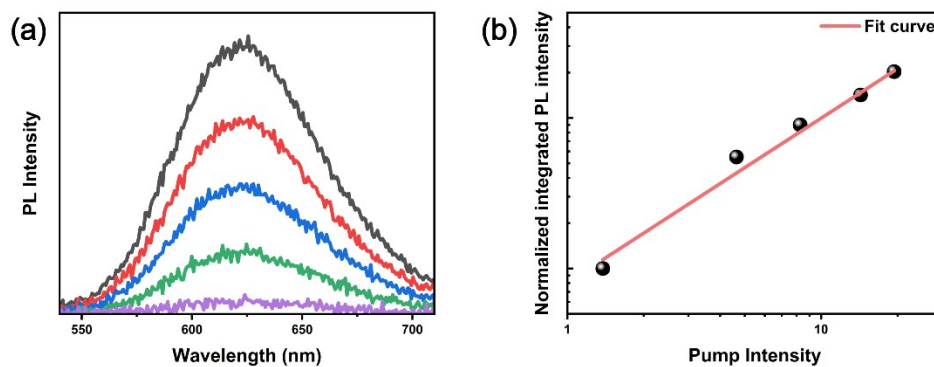

**Fig. S9.** (a)(b) The excitation power-dependent PL spectra of the  $\text{CsMnBr}_3 \cdot 2\text{H}_2\text{O} : \text{Ac}^-$  sample and the picture are the integrated intensity of peaks with the change of excitation power; the solid lines are theoretical fitting curves.

| No.            | concentration(mg/100g) |
|----------------|------------------------|
| 1              | 4.142                  |
| 2              | 4.272                  |
| 3              | 4.043                  |
| <b>Average</b> | <b>4.152</b>           |

**Table. S1** Acetate ion concentration and the average value obtained by HPIC, the unit is mg  $\text{Ac}^-/\text{g}$   $\text{CsMnBr}_3 \cdot 2\text{H}_2\text{O} : \text{Ac}^-$  single crystals.
